# Supplementary material for: miRmap: Comprehensive prediction of microRNA target repression strength
Source: PubMed Central journal article supplement (PMC3526310; doi:10.1093/nar/gks901), 2012-10-02
Supplement: supp_gks901_nar-01067-n-2012-File010.pdf [file supp_gks901_nar-01067-n-2012-File010.pdf]

# miRmap: Comprehensive prediction of microRNA target repression strength

## Supplementary information

The source code and documentation of the miRmap  
Python library is available online at:

<http://cegg.unige.ch/mirmap>

|                    |   | $\Delta G$ duplex | $\Delta G$ binding | $\Delta G$ open | $\Delta G$ total | P.over binomial | P.over exact | BLS      | PhyloP    | AU content | UTR position | 3' pairing |
|--------------------|---|-------------------|--------------------|-----------------|------------------|-----------------|--------------|----------|-----------|------------|--------------|------------|
| $\Delta G$ duplex  | r | 1.000             | 0.962              | -0.456          | 0.222            | 0.101           | 0.097        | 0.069    | -0.118    | 0.507      | 0.029        | -0.263     |
|                    | p | 0.00e+00          | 0.00e+00           | 0.00e+00        | 0.00e+00         | 0.00e+00        | 0.00e+00     | 0.00e+00 | 0.00e+00  | 0.00e+00   | 0.00e+00     | 0.00e+00   |
| $\Delta G$ binding | r | 0.962             | 1.000              | -0.416          | 0.241            | 0.102           | 0.098        | 0.065    | -0.110    | 0.464      | 0.026        | -0.260     |
|                    | p | 0.00e+00          | 0.00e+00           | 0.00e+00        | 0.00e+00         | 0.00e+00        | 0.00e+00     | 0.00e+00 | 0.00e+00  | 0.00e+00   | 0.00e+00     | 0.00e+00   |
| $\Delta G$ open    | r | -0.456            | -0.416             | 1.000           | 0.725            | -0.024          | -0.037       | -0.058   | 0.142     | -0.635     | 0.019        | 0.041      |
|                    | p | 0.00e+00          | 0.00e+00           | 0.00e+00        | 0.00e+00         | 0.00e+00        | 0.00e+00     | 0.00e+00 | 0.00e+00  | 0.00e+00   | 0.00e+00     | 0.00e+00   |
| $\Delta G$ total   | r | 0.222             | 0.241              | 0.725           | 1.000            | 0.058           | 0.037        | -0.005   | 0.070     | -0.317     | 0.034        | -0.157     |
|                    | p | 0.00e+00          | 0.00e+00           | 0.00e+00        | 0.00e+00         | 0.00e+00        | 0.00e+00     | 2.78e-27 | 0.00e+00  | 0.00e+00   | 0.00e+00     | 0.00e+00   |
| P.over binomial    | r | 0.101             | 0.102              | -0.024          | 0.058            | 1.000           | 0.806        | 0.405    | -0.002    | 0.044      | 0.451        | -0.003     |
|                    | p | 0.00e+00          | 0.00e+00           | 0.00e+00        | 0.00e+00         | 0.00e+00        | 0.00e+00     | 0.00e+00 | 1.05e-06  | 0.00e+00   | 0.00e+00     | 4.73e-11   |
| P.over exact       | r | 0.097             | 0.098              | -0.037          | 0.037            | 0.806           | 1.000        | 0.151    | -0.060    | 0.051      | 0.256        | -0.005     |
|                    | p | 0.00e+00          | 0.00e+00           | 0.00e+00        | 0.00e+00         | 0.00e+00        | 0.00e+00     | 0.00e+00 | 0.00e+00  | 0.00e+00   | 0.00e+00     | 9.41e-27   |
| BLS                | r | 0.069             | 0.065              | -0.058          | -0.005           | 0.405           | 0.151        | 1.000    | -0.386    | 0.079      | 0.232        | -0.001     |
|                    | p | 0.00e+00          | 0.00e+00           | 0.00e+00        | 2.78e-27         | 0.00e+00        | 0.00e+00     | 0.00e+00 | 0.00e+00  | 0.00e+00   | 0.00e+00     | 1.99e-02   |
| PhyloP             | r | -0.118            | -0.110             | 0.142           | 0.070            | -0.002          | -0.060       | -0.386   | 1.000     | -0.186     | 0.138        | 0.011      |
|                    | p | 0.00e+00          | 0.00e+00           | 0.00e+00        | 0.00e+00         | 1.05e-06        | 0.00e+00     | 0.00e+00 | 0.00e+00  | 0.00e+00   | 0.00e+00     | 7.86e-114  |
| AU content         | r | 0.507             | 0.464              | -0.635          | -0.317           | 0.044           | 0.051        | 0.079    | -0.186    | 1.000      | 0.044        | -0.062     |
|                    | p | 0.00e+00          | 0.00e+00           | 0.00e+00        | 0.00e+00         | 0.00e+00        | 0.00e+00     | 0.00e+00 | 0.00e+00  | 0.00e+00   | 0.00e+00     | 0.00e+00   |
| UTR position       | r | 0.029             | 0.026              | 0.019           | 0.034            | 0.451           | 0.256        | 0.232    | 0.138     | 0.044      | 1.000        | -0.000     |
|                    | p | 0.00e+00          | 0.00e+00           | 0.00e+00        | 0.00e+00         | 0.00e+00        | 0.00e+00     | 0.00e+00 | 0.00e+00  | 0.00e+00   | 0.00e+00     | 7.35e-01   |
| 3' pairing         | r | -0.263            | -0.260             | 0.041           | -0.157           | -0.003          | -0.005       | -0.001   | 0.011     | -0.062     | -0.000       | 1.000      |
|                    | p | 0.00e+00          | 0.00e+00           | 0.00e+00        | 0.00e+00         | 4.73e-11        | 9.41e-27     | 1.99e-02 | 7.86e-114 | 0.00e+00   | 7.35e-01     | 0.00e+00   |

**Supplementary Table 1** Correlation among features for human miRNAs and mRNAs. Each cell contains the Spearman rank correlation coefficient ( $r$ ) and the corresponding p-value ( $p$ ).

|                    |    | Trans.Grimson | Trans.Linsley | Prot.Selbach | IPcross.Chi | IP.Hendrickson | RibN.Hendrickson | Trans.Hendrickson |
|--------------------|----|---------------|---------------|--------------|-------------|----------------|------------------|-------------------|
| AU content         | r  | -0.229        | -0.166        | -0.163       | 0.160       | 0.249          | -0.228           | -0.293            |
| AU content         | p  | 1.17e-48      | 1.92e-57      | 1.70e-06     | 2.51e-05    | 8.02e-10       | 1.86e-08         | 3.47e-13          |
| AU content         | r' | -0.967        | -0.868        | -0.922       | 0.944       | 0.994          | -0.982           | -0.986            |
| AU content         | p' | 4.68e-09      | 2.72e-05      | 8.97e-03     | 4.68e-03    | 5.13e-05       | 4.79e-04         | 2.87e-04          |
| UTR position       | r  | 0.117         | 0.060         | 0.064        | -0.022      | -0.278         | 0.125            | 0.206             |
| UTR position       | p  | 1.39e-13      | 8.33e-09      | 6.26e-02     | 5.63e-01    | 5.18e-12       | 2.20e-03         | 3.92e-07          |
| UTR position       | r' | 0.880         | 0.643         | 0.612        | -0.178      | -0.921         | 0.774            | 0.804             |
| UTR position       | p' | 1.51e-05      | 9.79e-03      | 1.96e-01     | 7.36e-01    | 9.02e-03       | 7.09e-02         | 5.36e-02          |
| 3' pairing         | r  | -0.051        | -0.041        | -0.058       | 0.030       | 0.099          | -0.043           | -0.028            |
| 3' pairing         | p  | 1.16e-03      | 7.49e-05      | 9.13e-02     | 4.26e-01    | 1.62e-02       | 2.95e-01         | 4.90e-01          |
| 3' pairing         | r' | -0.493        | -0.764        | -0.757       | 0.167       | 0.607          | -0.441           | -0.269            |
| 3' pairing         | p' | 6.20e-02      | 9.05e-04      | 8.17e-02     | 7.52e-01    | 2.02e-01       | 3.81e-01         | 6.06e-01          |
| $\Delta$ G duplex  | r  | 0.000         | -0.062        | -0.017       | 0.017       | -0.002         | -0.059           | -0.055            |
| $\Delta$ G duplex  | p  | 9.87e-01      | 3.34e-09      | 6.13e-01     | 6.57e-01    | 9.53e-01       | 1.49e-01         | 1.79e-01          |
| $\Delta$ G duplex  | r' | 0.039         | -0.657        | -0.167       | -0.009      | 0.086          | -0.521           | -0.430            |
| $\Delta$ G duplex  | p' | 8.89e-01      | 7.75e-03      | 7.52e-01     | 9.86e-01    | 8.71e-01       | 2.89e-01         | 3.94e-01          |
| $\Delta$ G binding | r  | 0.023         | -0.050        | 0.001        | 0.020       | -0.007         | -0.042           | -0.027            |
| $\Delta$ G binding | p  | 1.43e-01      | 1.70e-06      | 9.69e-01     | 5.99e-01    | 8.63e-01       | 3.11e-01         | 5.05e-01          |
| $\Delta$ G binding | r' | 0.320         | -0.598        | 0.198        | 0.184       | 0.054          | -0.563           | -0.272            |
| $\Delta$ G binding | p' | 2.45e-01      | 1.85e-02      | 7.06e-01     | 7.27e-01    | 9.20e-01       | 2.44e-01         | 6.02e-01          |
| $\Delta$ G open    | r  | 0.196         | 0.107         | 0.085        | -0.108      | -0.234         | 0.194            | 0.257             |
| $\Delta$ G open    | p  | 4.42e-36      | 1.61e-24      | 1.31e-02     | 4.47e-03    | 7.40e-09       | 1.82e-06         | 1.95e-10          |
| $\Delta$ G open    | r' | 0.950         | 0.788         | 0.939        | -0.914      | -0.875         | 0.949            | 0.947             |
| $\Delta$ G open    | p' | 6.23e-08      | 4.79e-04      | 5.56e-03     | 1.09e-02    | 2.25e-02       | 3.84e-03         | 4.12e-03          |
| $\Delta$ G total   | r  | 0.204         | 0.086         | 0.078        | -0.096      | -0.249         | 0.183            | 0.251             |
| $\Delta$ G total   | p  | 8.31e-39      | 1.95e-16      | 2.28e-02     | 1.18e-02    | 7.02e-10       | 7.08e-06         | 5.09e-10          |
| $\Delta$ G total   | r' | 0.939         | 0.833         | 0.735        | -0.802      | -0.824         | 0.865            | 0.940             |
| $\Delta$ G total   | p' | 2.27e-07      | 1.17e-04      | 9.57e-02     | 5.51e-02    | 4.39e-02       | 2.60e-02         | 5.21e-03          |
| P.over exact       | r  | 0.170         | 0.065         | 0.073        | 0.015       | -0.222         | 0.076            | 0.221             |
| P.over exact       | p  | 2.93e-27      | 4.12e-10      | 3.32e-02     | 7.02e-01    | 4.75e-08       | 6.45e-02         | 5.27e-08          |
| P.over exact       | r' | 0.920         | 0.745         | 0.687        | 0.069       | -0.875         | 0.914            | 0.837             |
| P.over exact       | p' | 1.25e-06      | 1.45e-03      | 1.31e-01     | 8.97e-01    | 2.25e-02       | 1.07e-02         | 3.76e-02          |
| P.over binomial    | r  | 0.147         | 0.067         | 0.069        | 0.029       | -0.207         | 0.085            | 0.188             |
| P.over binomial    | p  | 1.24e-20      | 1.08e-10      | 4.30e-02     | 4.40e-01    | 3.74e-07       | 3.84e-02         | 3.91e-06          |
| P.over binomial    | r' | 0.867         | 0.634         | 0.702        | 0.329       | -0.826         | 0.677            | 0.860             |
| P.over binomial    | p' | 2.84e-05      | 1.12e-02      | 1.20e-01     | 5.24e-01    | 4.29e-02       | 1.40e-01         | 2.80e-02          |
| BLS                | r  | -0.158        | -0.108        | -0.124       | 0.112       | 0.148          | -0.160           | -0.226            |
| BLS                | p  | 9.93e-24      | 2.99e-25      | 2.78e-04     | 3.36e-03    | 2.96e-04       | 8.95e-05         | 2.66e-08          |
| BLS                | r' | -0.954        | -0.815        | -0.931       | 0.893       | 0.661          | -0.817           | -0.883            |
| BLS                | p' | 3.52e-08      | 2.14e-04      | 6.97e-03     | 1.66e-02    | 1.53e-01       | 4.70e-02         | 1.97e-02          |
| PhyloP             | r  | -0.205        | -0.143        | -0.172       | 0.196       | 0.116          | -0.155           | -0.223            |
| PhyloP             | p  | 3.00e-39      | 2.97e-43      | 4.49e-07     | 2.22e-07    | 4.74e-03       | 1.49e-04         | 4.12e-08          |
| PhyloP             | r' | -0.949        | -0.857        | -0.946       | 0.856       | 0.719          | -0.918           | -0.929            |
| PhyloP             | p' | 6.82e-08      | 4.46e-05      | 4.31e-03     | 2.96e-02    | 1.07e-01       | 9.83e-03         | 7.34e-03          |
| PhastCons          | r  | -0.205        | -0.128        | -0.143       | 0.223       | 0.020          | -0.093           | -0.124            |
| PhastCons          | p  | 3.26e-39      | 6.51e-35      | 2.69e-05     | 3.22e-09    | 6.20e-01       | 2.35e-02         | 2.38e-03          |
| PhastCons          | r' | -0.920        | -0.823        | -0.975       | 0.905       | 0.157          | -0.704           | -0.690            |
| PhastCons          | p' | 1.24e-06      | 1.67e-04      | 9.59e-04     | 1.31e-02    | 7.67e-01       | 1.18e-01         | 1.30e-01          |

**Supplementary Table 2** Correlation between each feature and the seven experimental miRNA repression measures. Data points were binned in 15 equally-sized bins.  $r$  is the correlation on the full dataset ( $p$ : corresponding p-value);  $r'$  is the correlation on the binned dataset ( $p'$ : corresponding p-value).

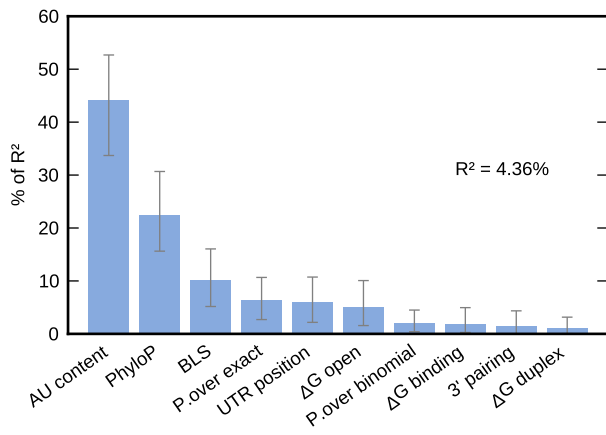

Linsley

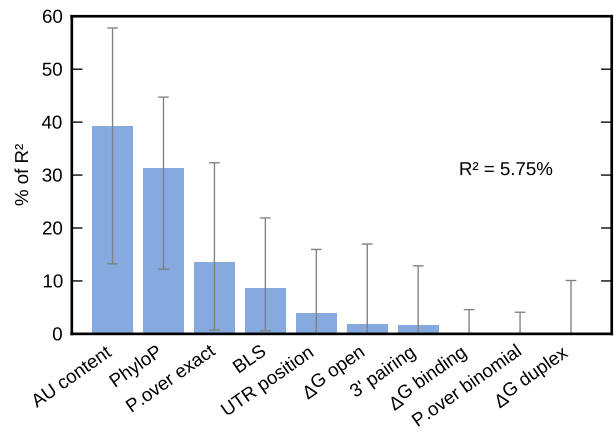

Selbach

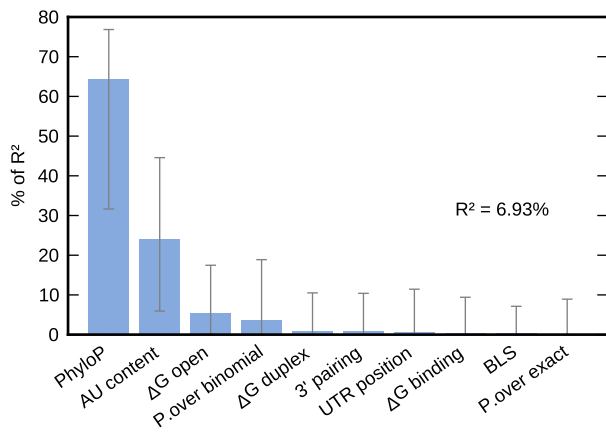

Chi

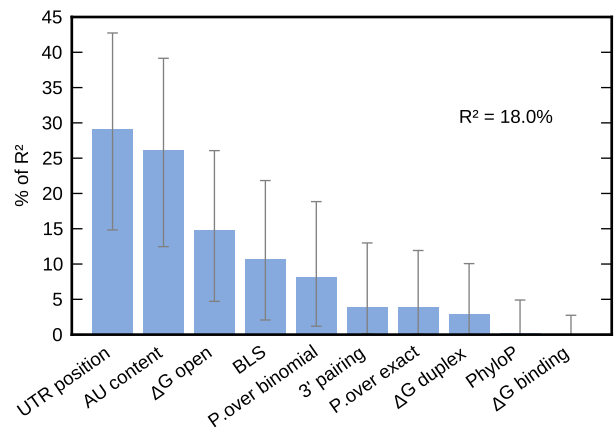

Hendrickson IP

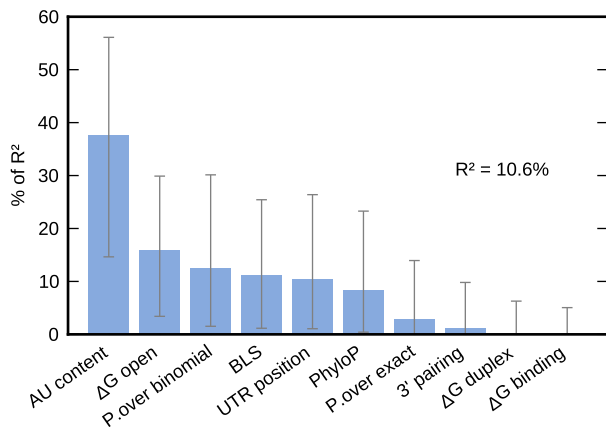

Hendrickson Ribosome-number

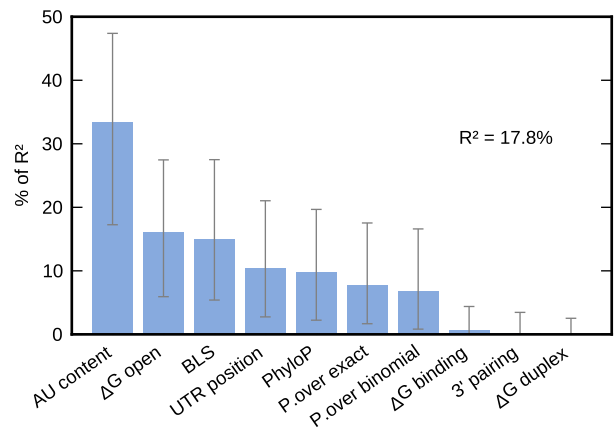

Hendrickson Transcriptomics

**Supplementary Figure 1** Feature relative importance in the miRmap multiple linear regression models predicting miRNA repression strength for all datasets used in this study considering 7-mer seeds. R<sup>2</sup> is the proportion of variance explained by the model.

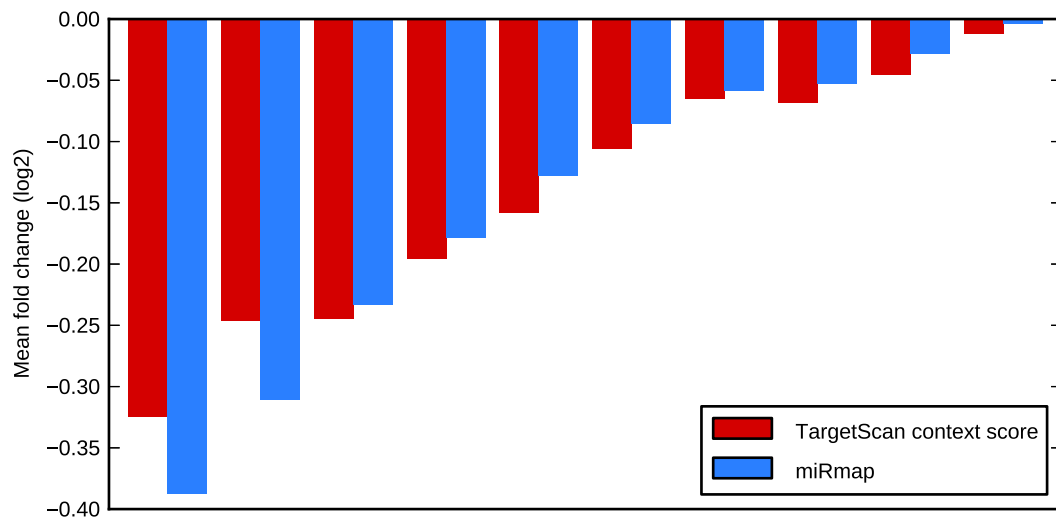

**Supplementary Figure 2** Predictive performance of miRmap and TargetScan context score models for 7-mer seeds. All predicted miRNA-mRNA pairs were ranked according to their predicted strength and binned into 10 equally-sized bins. For each bin, the average experimental fold-change was computed. The same procedure was repeated with the miRmap and TargetScan context score models. (Trans.Grimson dataset)

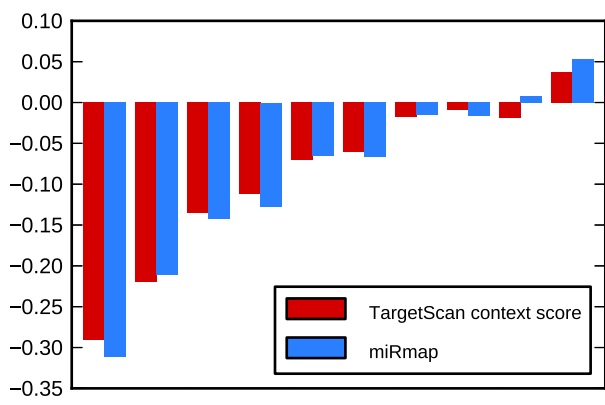

Linsley

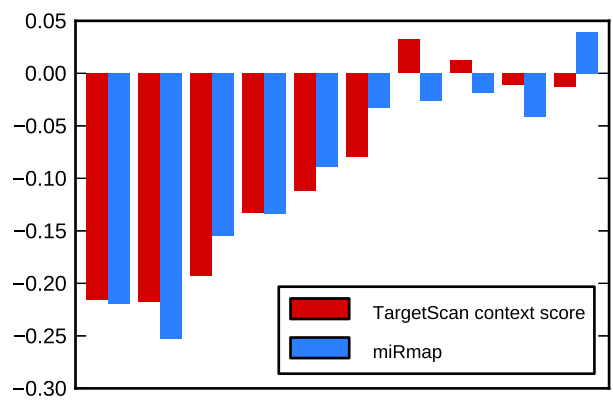

Selbach

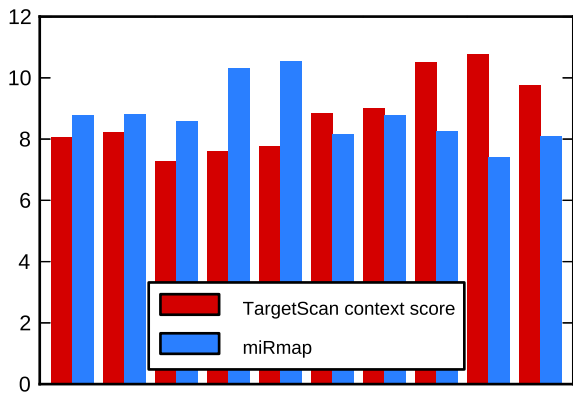

Chi

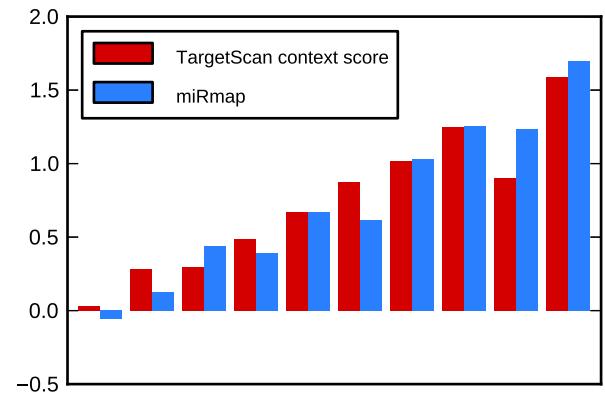

Hendrickson IP

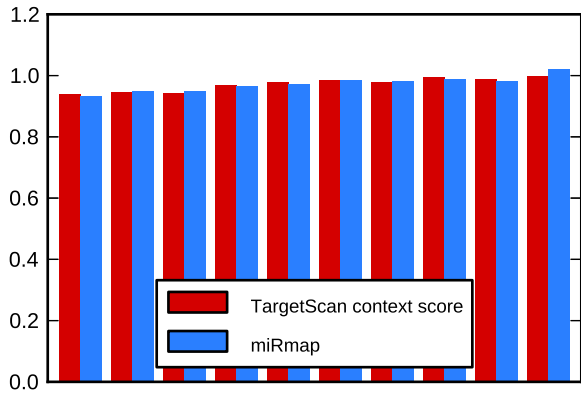

Hendrickson Ribosome-number

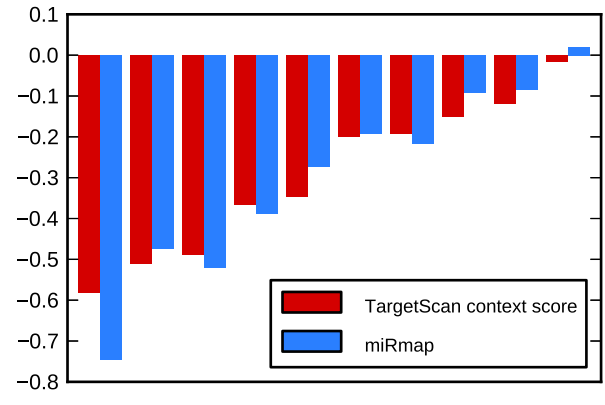

Hendrickson Transcriptomics

**Supplementary Figure 3** Predictive performance of miRmap and TargetScan context score models for 7-mer seeds. All predicted miRNA-mRNA pairs were ranked according to their predicted strength and binned into 10 equally-sized bins. For each bin, the average experimental fold-change was computed. The same procedure was repeated with the miRmap and TargetScan context score models.

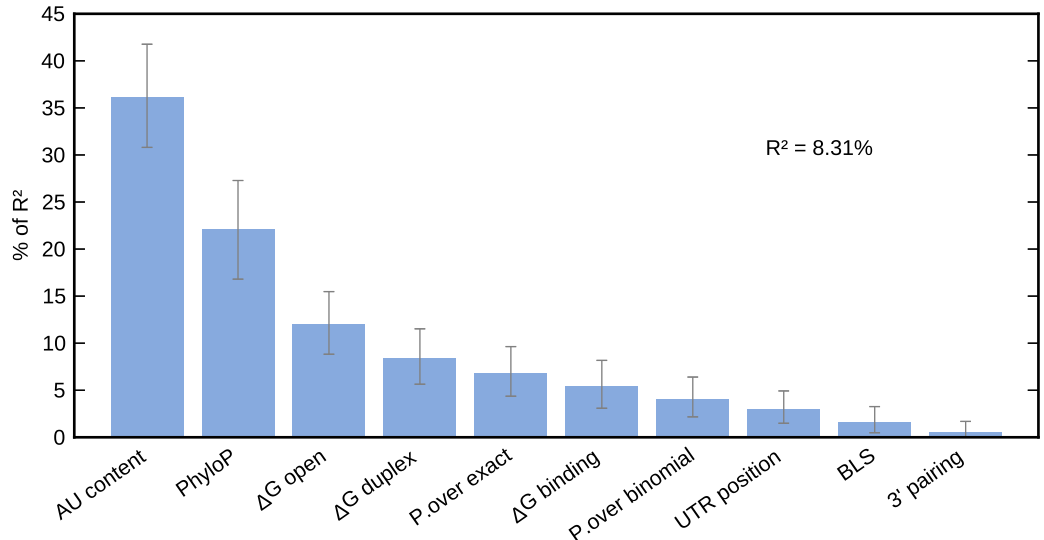

A

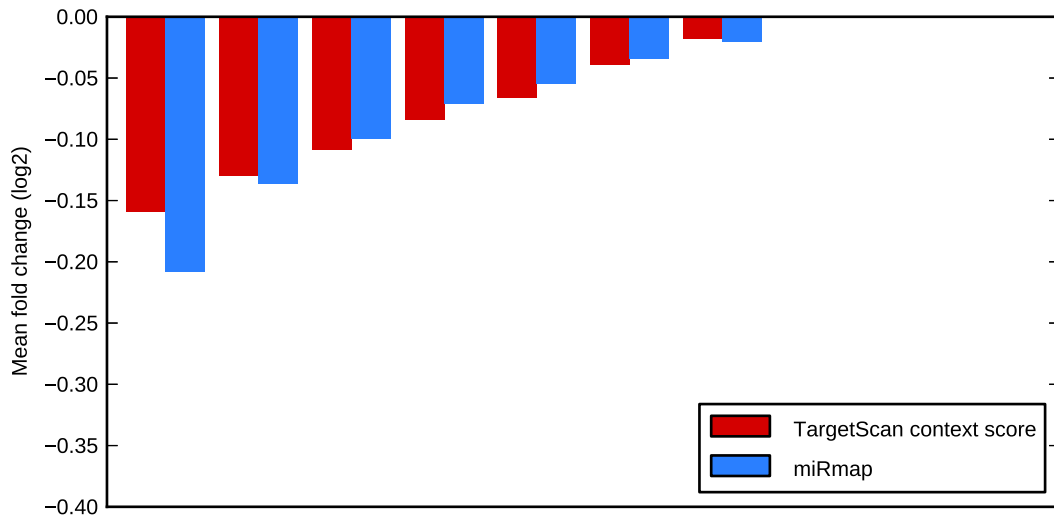

B

**Supplementary Figure 4** Performance and feature relative importance for 6-mer seeds. The same procedures as in Figure 5B (A) and in Supplementary Figure 3 (B) were applied to the set of potential target sites defined by the presence of a single 6-mer seed-match. (Trans.Grimson dataset)

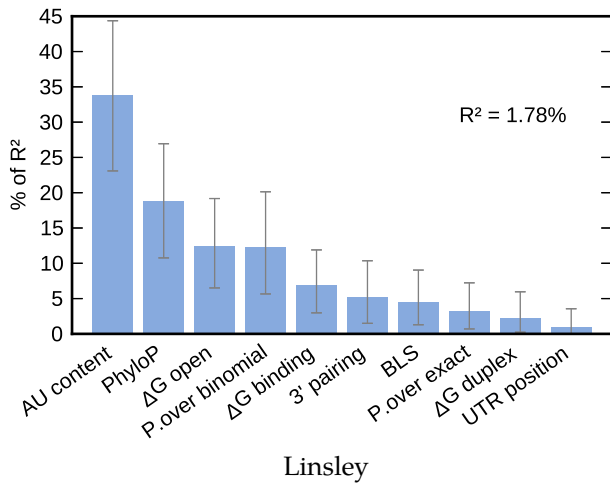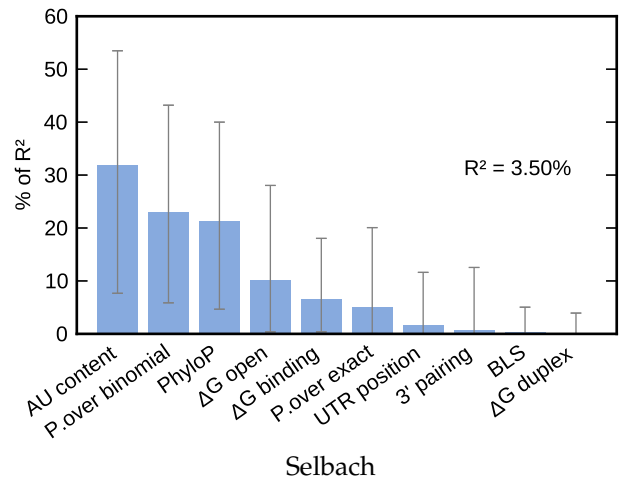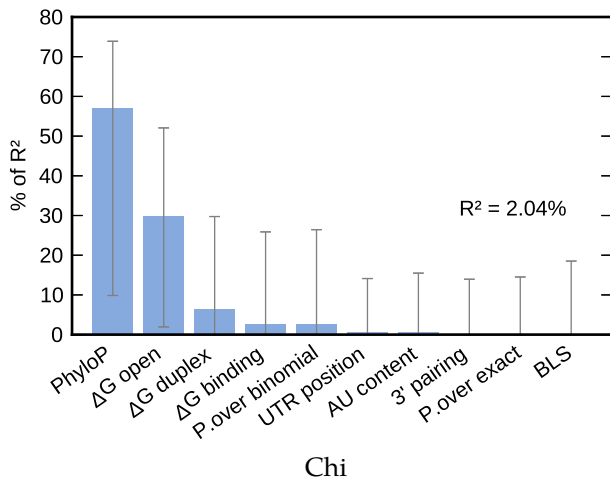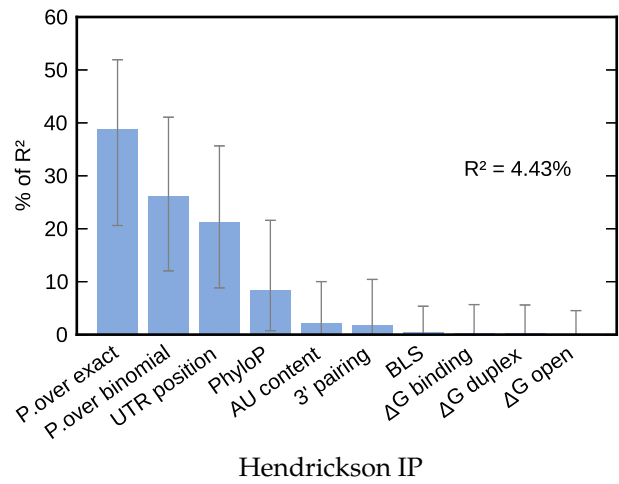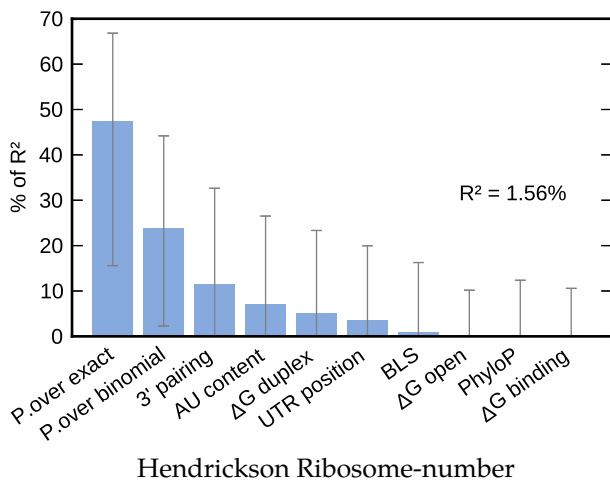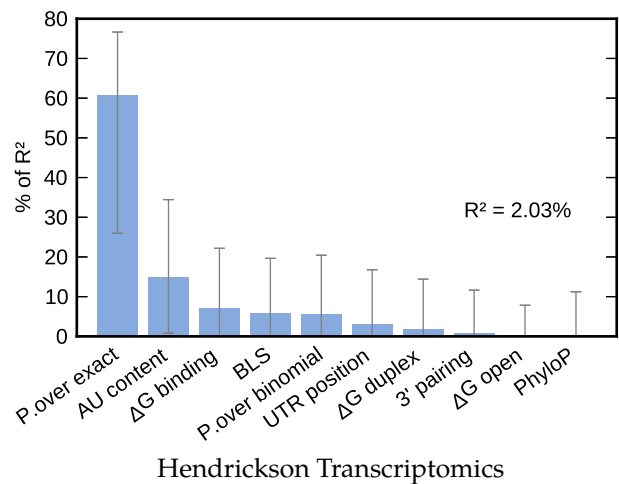

**Supplementary Figure 5** Feature relative importance in the miRmap multiple linear regression models predicting miRNA repression strength for all datasets used in this study considering 6-mer seeds. R<sup>2</sup> is the proportion of variance explained by the model.



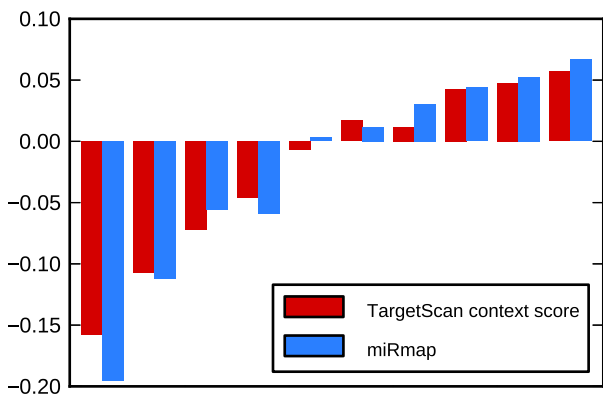

Linsley

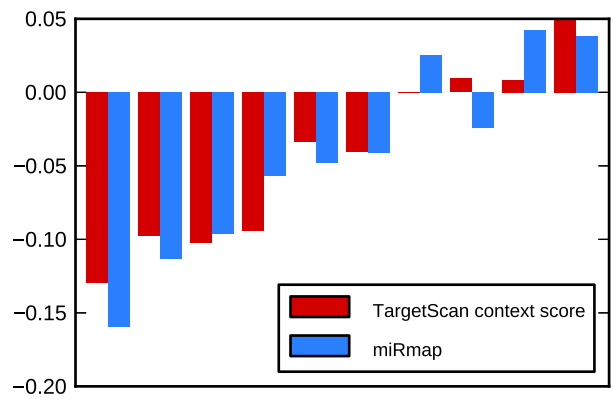

Selbach

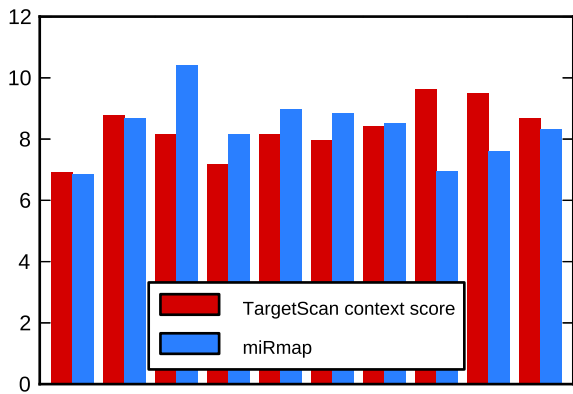

Chi

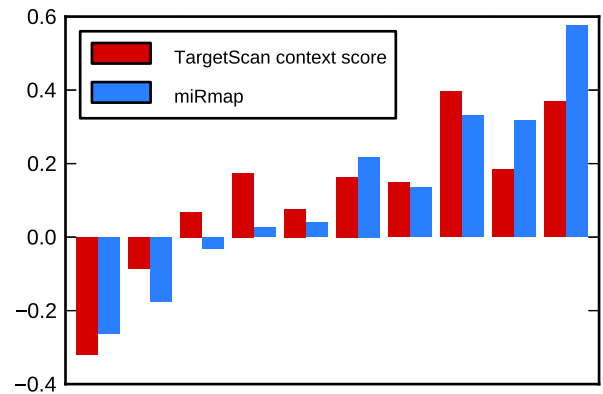

Hendrickson IP

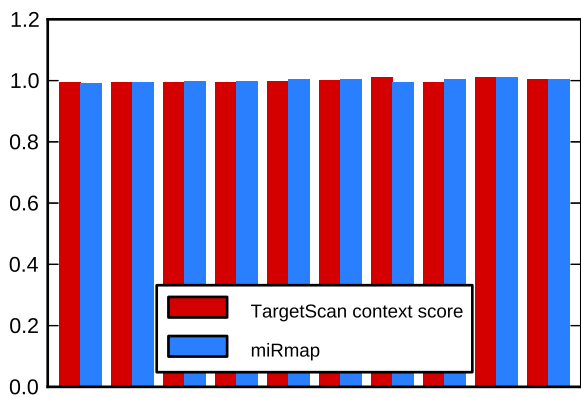

Hendrickson Ribosome-number

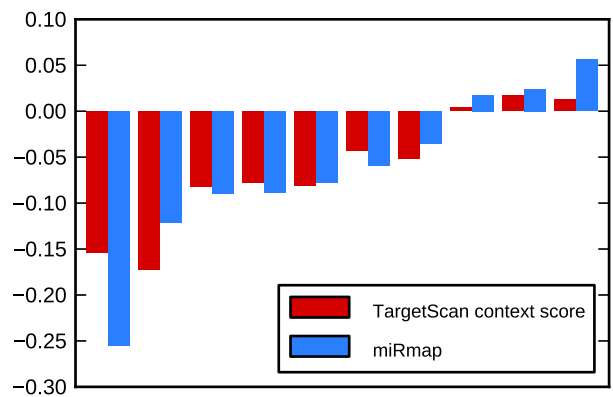

Hendrickson Transcriptomics

**Supplementary Figure 6** Predictive performance of miRmap and TargetScan context score models for 6-mer seeds. All predicted miRNA-mRNA pairs were ranked according to their predicted strength and binned into 10 equally-sized bins. For each bin, the average experimental fold-change was computed. The same procedure was repeated with the miRmap and TargetScan context score models.

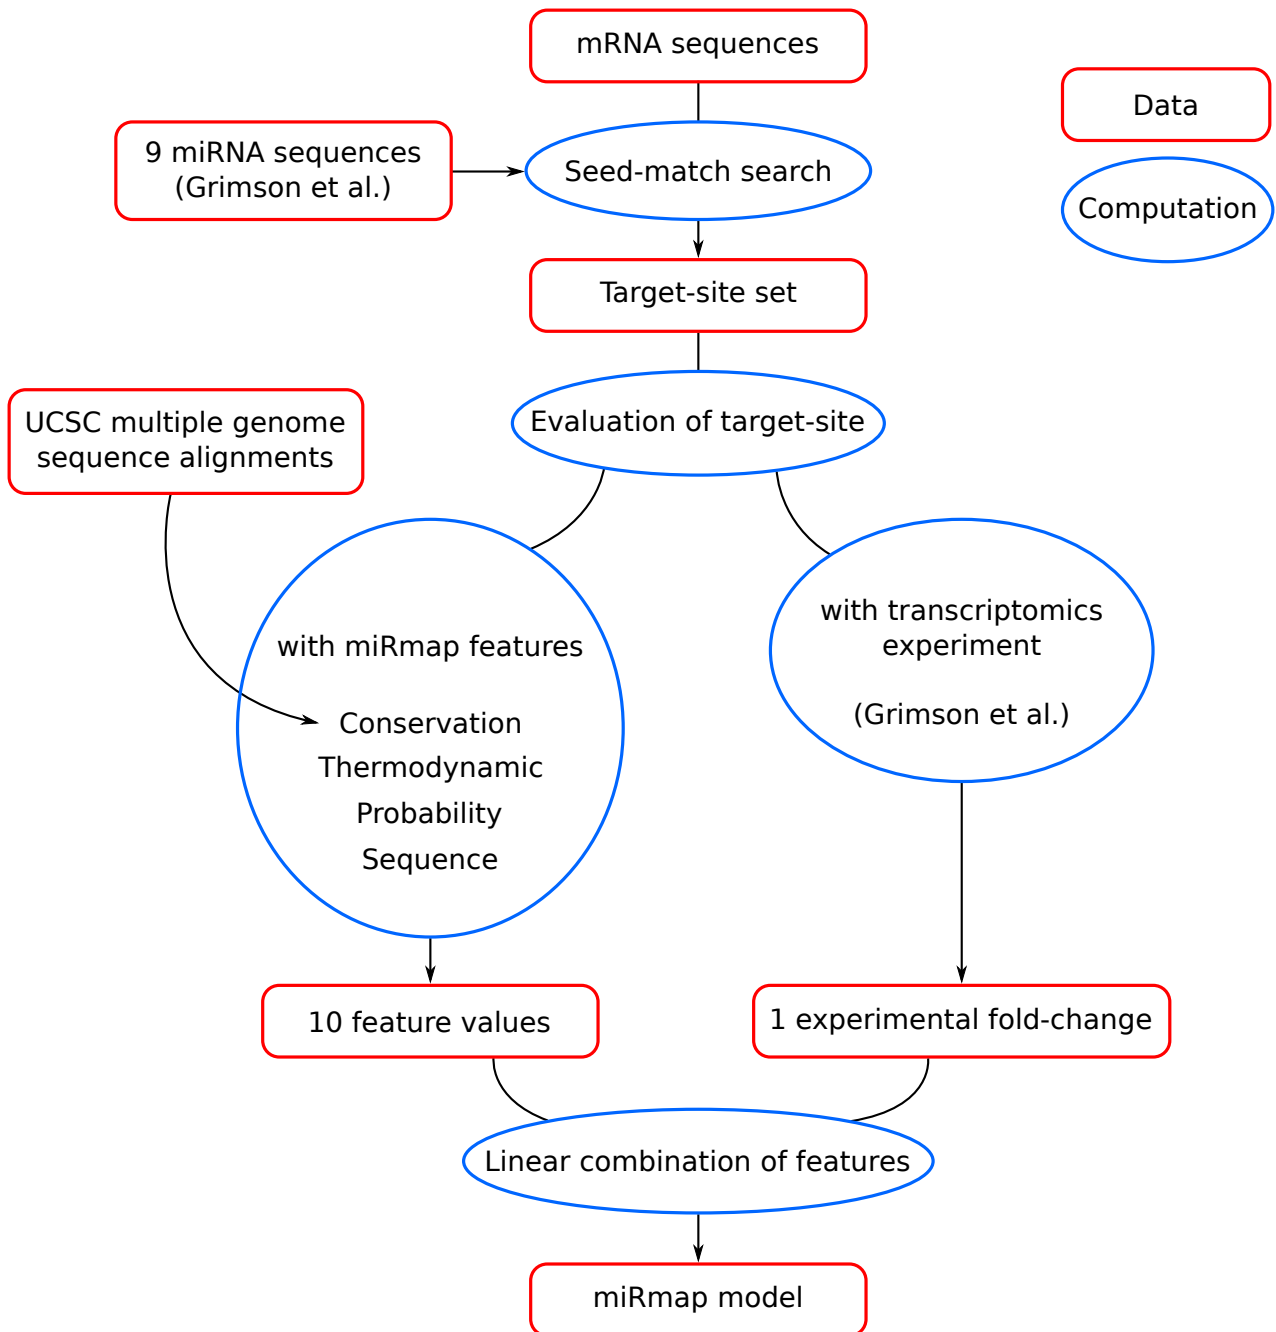

**Supplementary Figure 7** Description of the miRmap model building. After the target site identification with seed-matches, their repression strength is evaluated computationally and experimentally. The linear combination of the features based on the experimental output is the miRmap model.

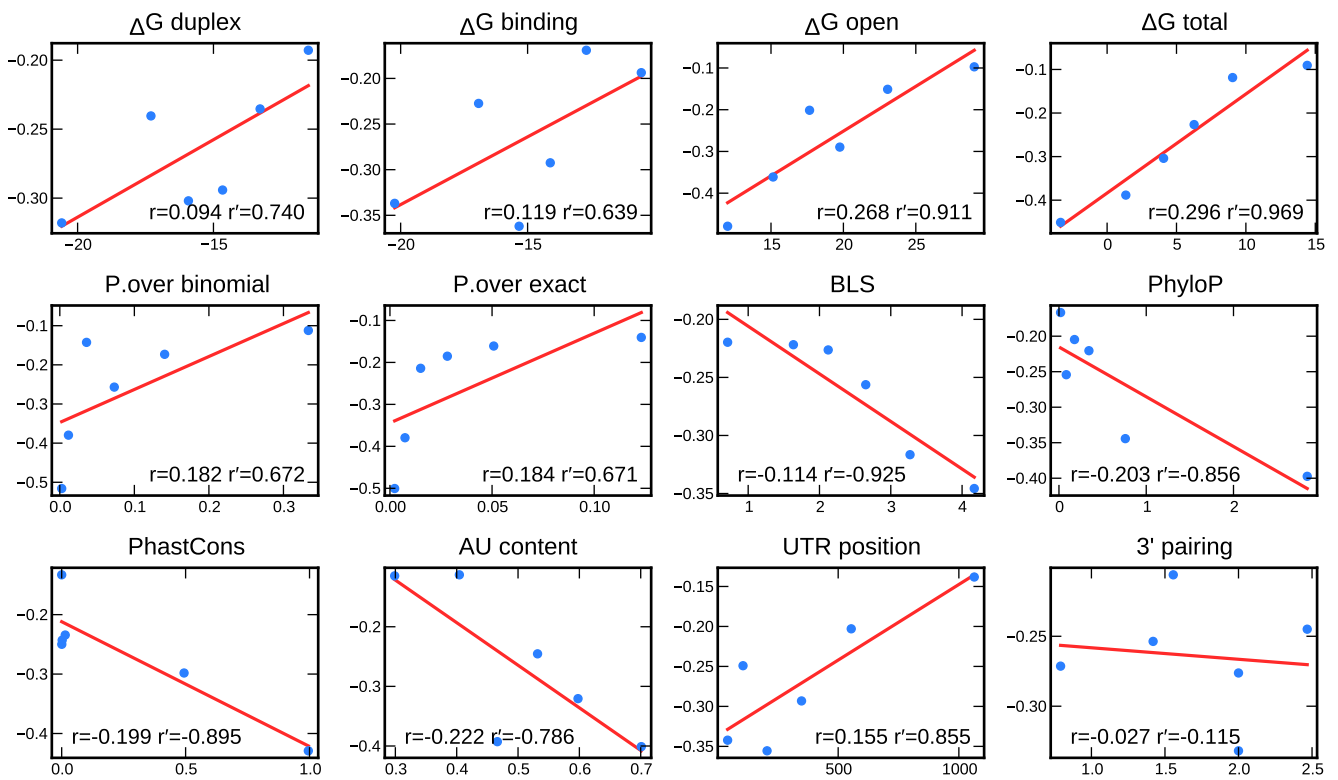

*min()*

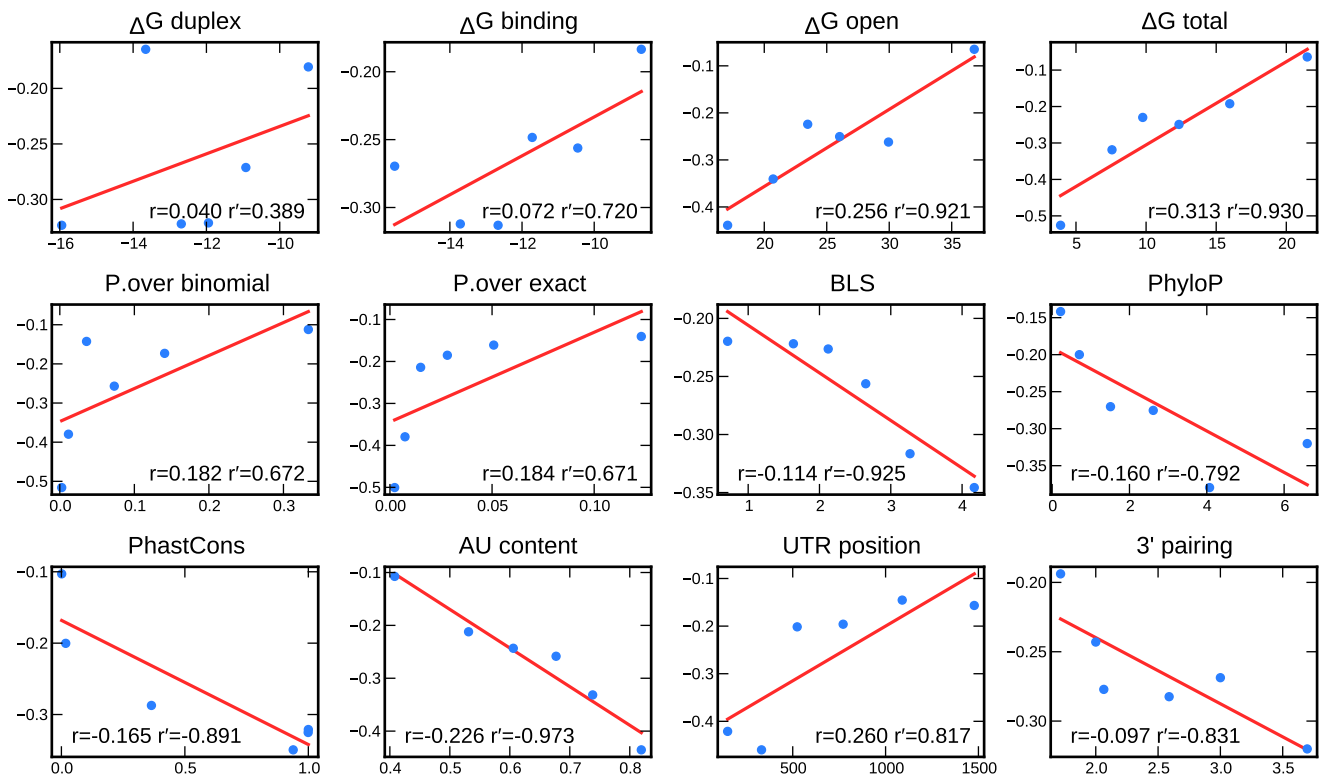

*max()*

**Supplementary Figure 8** (see next page for legend)

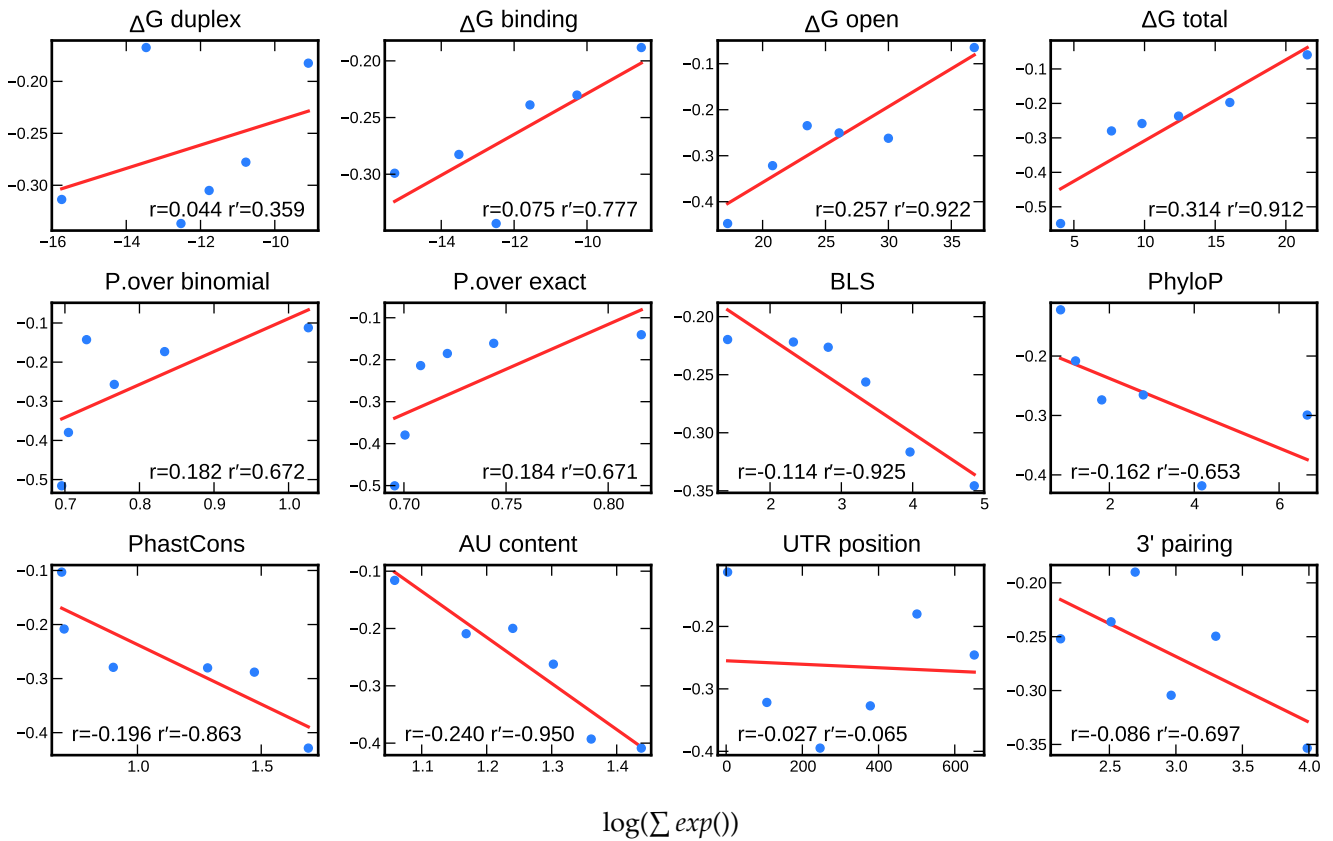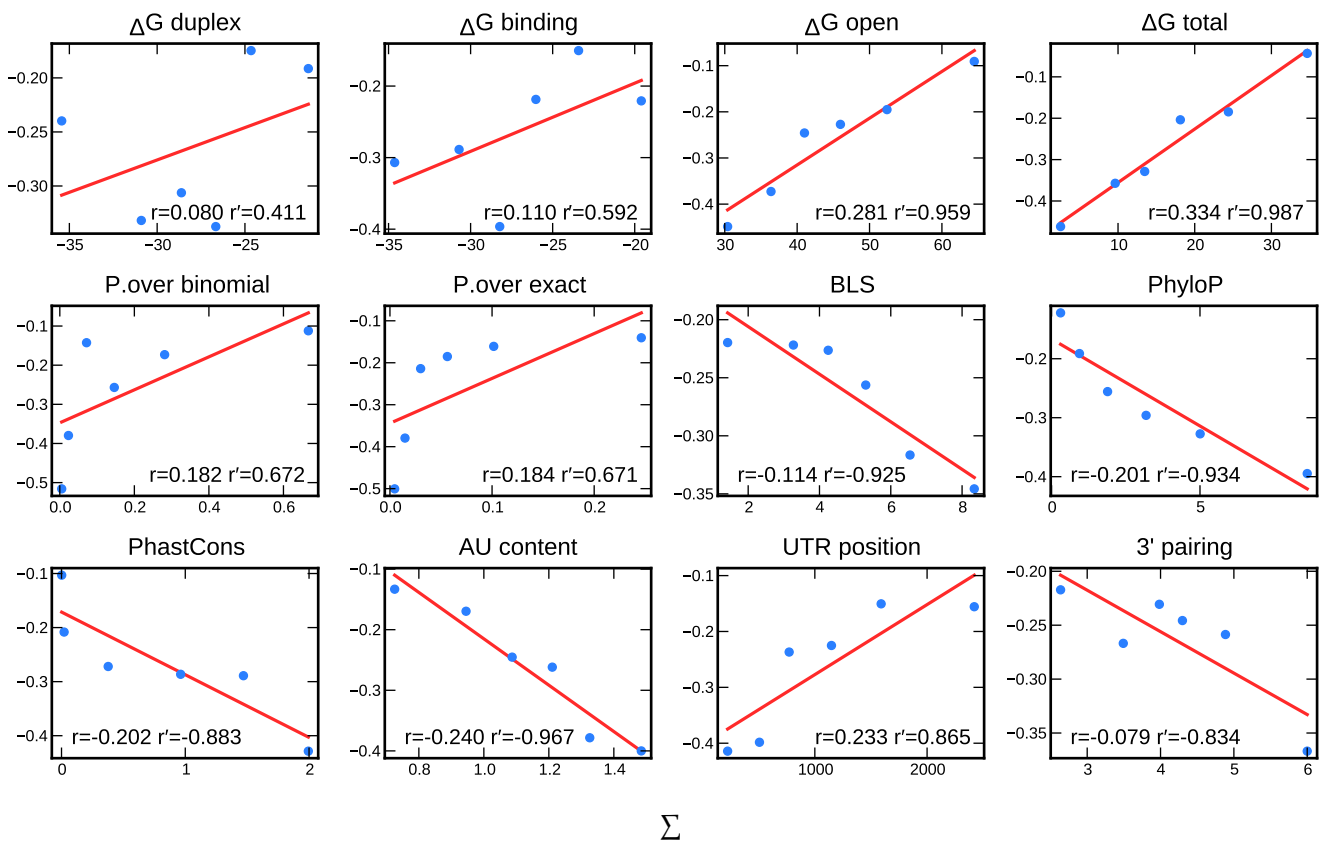

**Supplementary Figure 8** Correlation similar to Figure 3 for mRNAs with 2 target sites (*Trans.Grimson* dataset) combined with 4 different functions, shown at the bottom of each picture block.
